# Supplementary material for: Spatiotemporally modulated polyphenol–protein coating for accelerated healing of chronic wounds
Source: Royal Society of Chemistry journal article supplement (doi:10.1039/d5tb01078k), 2025-01-01
Supplement: d5tb01078k1.pdf [file d5tb01078k1.pdf]

**Spatiotemporally modulated polyphenol-protein coating for accelerated healing  
of chronic wounds**

Linhua Li<sup>1#</sup>, Qingyin Li<sup>2#</sup>, Chunle Zhang<sup>1</sup>, Zhengjiang Cao<sup>1</sup>, Chang Liu<sup>1</sup>, Rifang Luo<sup>4</sup>,  
Yunbing Wang<sup>4</sup>, Xiaoxi Zeng<sup>3\*</sup>, Ping Fu<sup>1\*</sup>

<sup>1</sup> Department of Nephrology, Institute of Kidney Diseases, West China Hospital of Sichuan University, Chengdu 610041, China.

<sup>2</sup> Department of Nephrology, Institute of Kidney Diseases, Frontiers Science Center for Disease-related Molecular Network, West China Hospital, Sichuan University, Chengdu 610041, Sichuan, China

<sup>3</sup> Department of Nephrology and West China Biomedical Big Data Center, West China Hospital of Sichuan University,

<sup>4</sup> National Engineering Research Center for Biomaterials, Sichuan University, Chengdu, 610064, China.

E-mail: [zengxiaoxi@wchscu.cn](mailto:zengxiaoxi@wchscu.cn); [fupinghx@scu.edu.cn](mailto:fupinghx@scu.edu.cn)

## 2. Supporting Figures

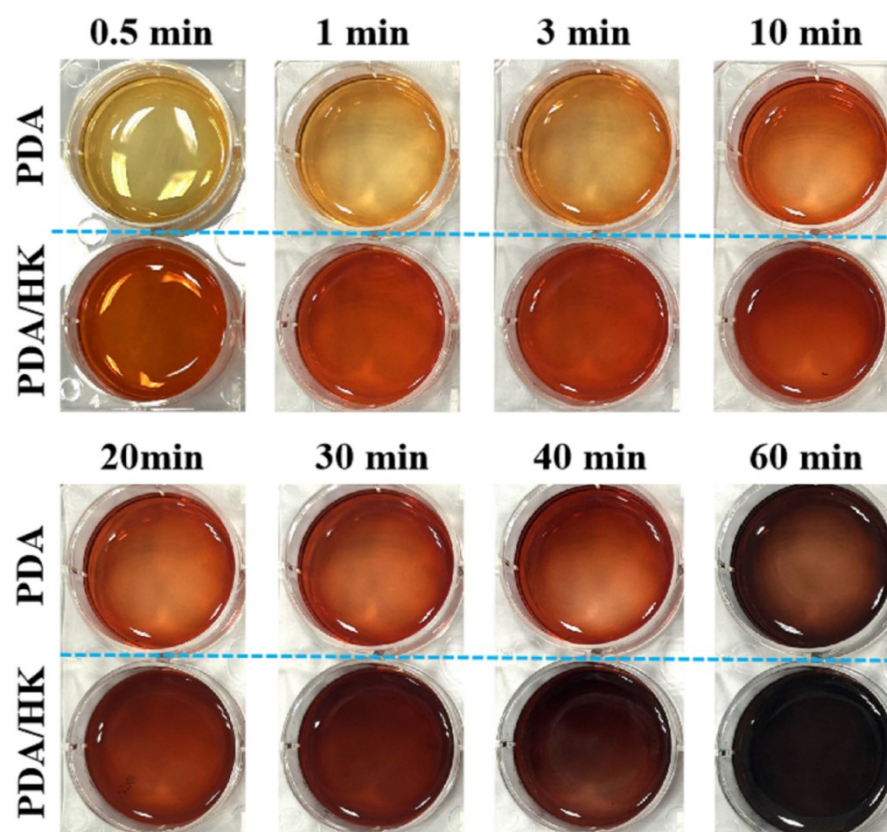

**Figure. S1.** Photographs of reaction solutions PDA and PDA/HK at different times.

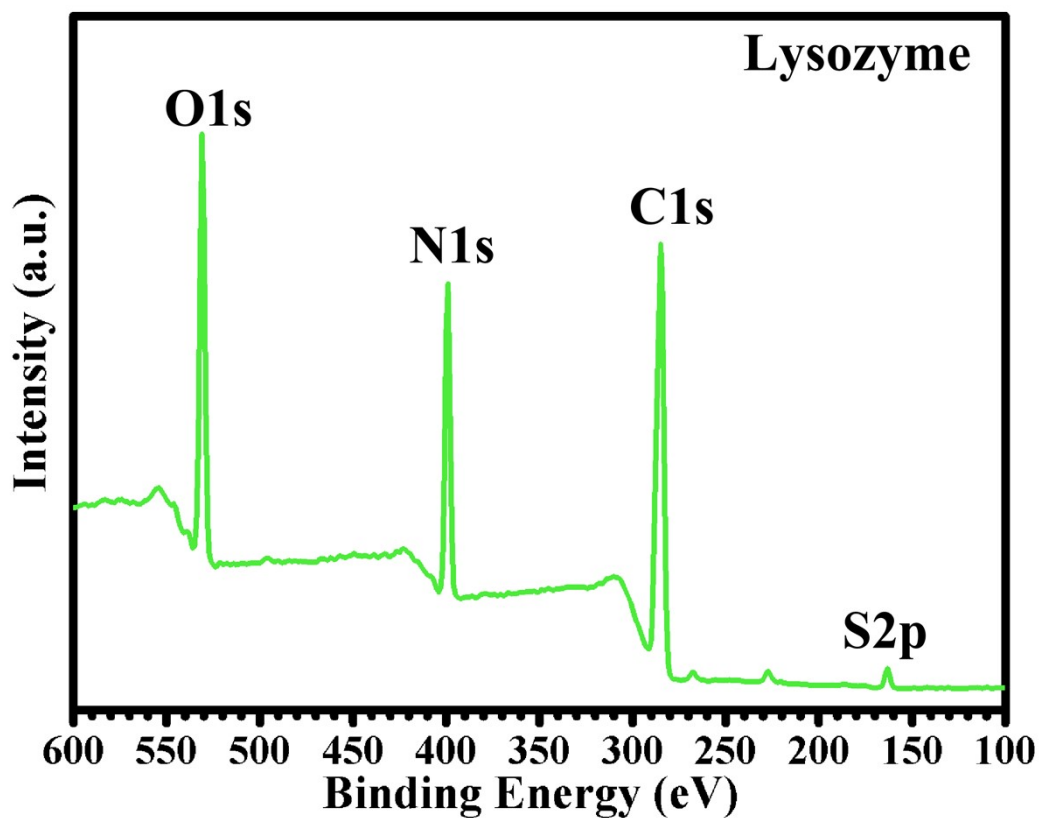

Figure. S2. XPS full spectrum of lysozyme.

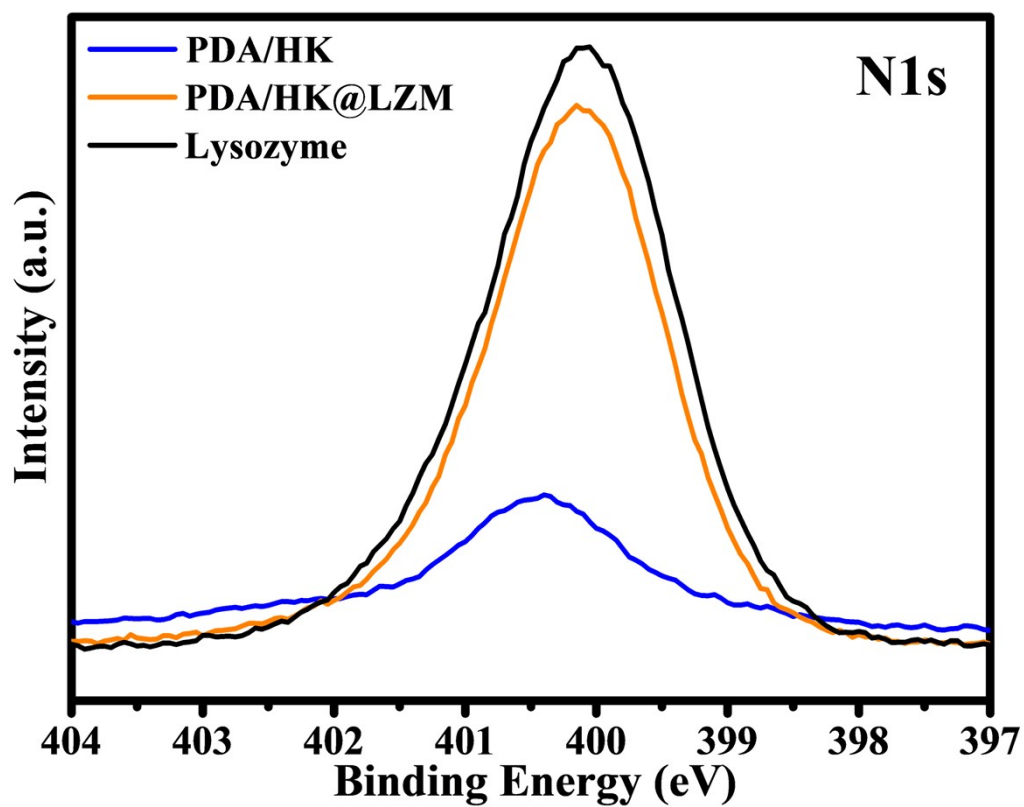

Figure. S3. High-resolution spectra of N1s.

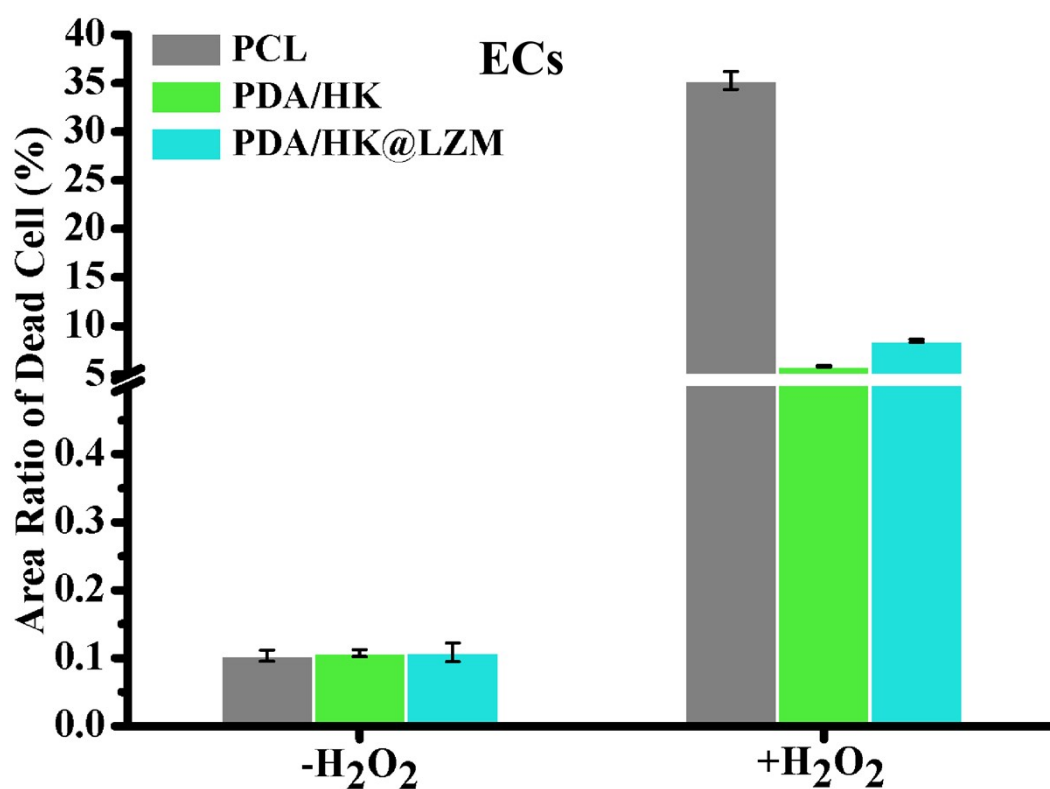

Figure. S4. Area ratio of dead cells after incubation of ECs with different extracts.

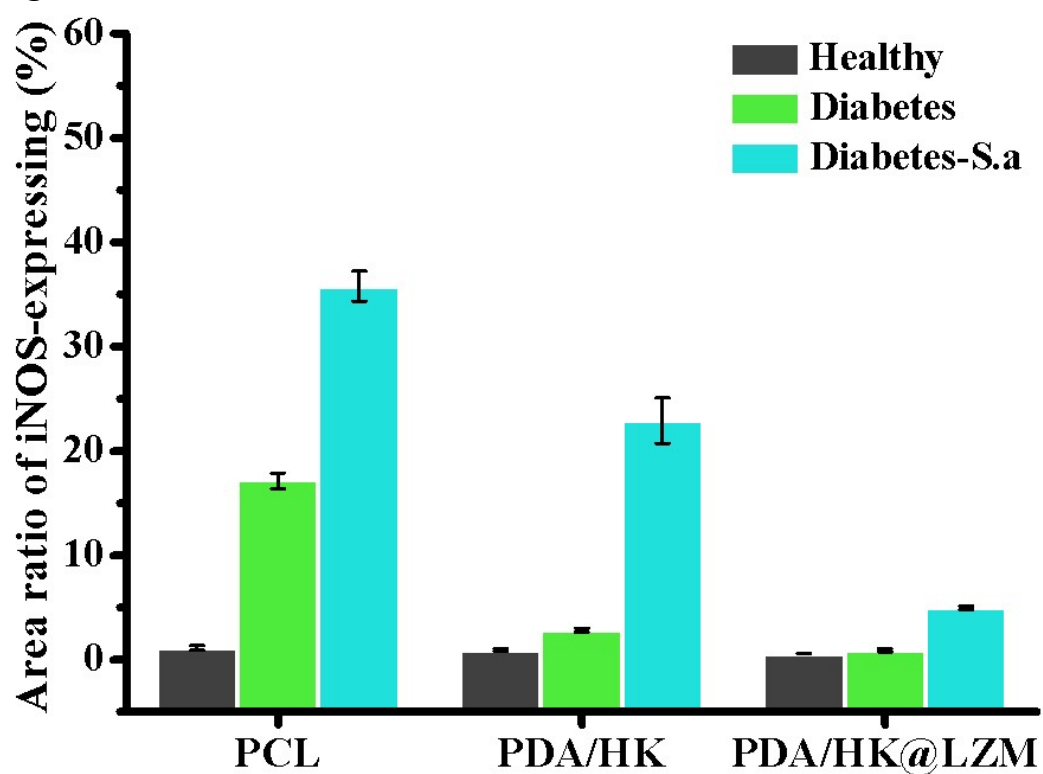

Figure. S5. The ratio of areas expressing iNOS protein in wound tissues treated by different dressings.

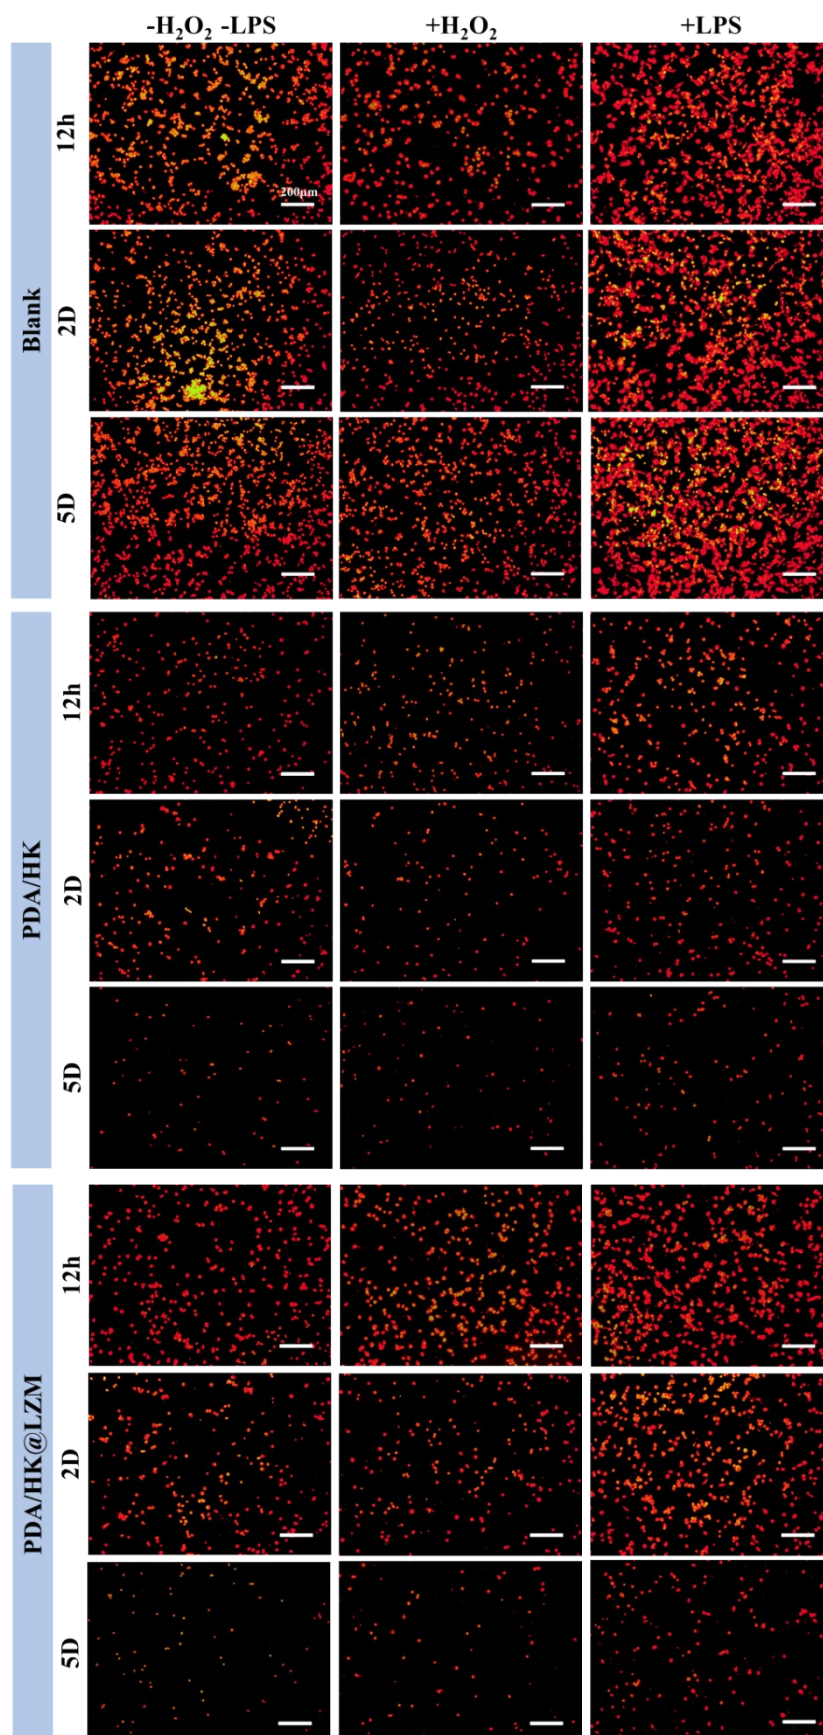

**Figure S6.** Macrophage morphology after exposure to extracts (12 h, 2 d, 5 d) from different surfaces under various stimuli.
